# Supplementary material for: Analysis of the gut and oral microbiome in patients with Stevens-Johnson syndrome and Sjögren’s disease: associations with dry eye severity
Source: Research Square preprint supplement (doi:10.21203/rs.3.rs-6516559/v1), 2025-05-20
Supplement: Supplementary file 1 [file bfcb068b1aa4c66135ecd977.docx]

Table E1. Summary of clinical data, showing mean ± standard deviation in oral microbiome.

|  | **OSDI,** | **Schirmer I test,** | **Tear-break-up time** | **NEI,** | **DED DEWS,** |
| --- | --- | --- | --- | --- | --- |
|  | **score** | **mm** | **seconds** | **score** | **score** |
|  |  |  |  |  |  |
| Controls | 0.67± 1.15 | 38.17 ± 3.18 | 11.0 ± 1.00 | 0.00 ± 0.00 | 0 (3/3) |
| SJS | 63.37 ± 20.50 | 12.40 ± 13.88 | 2.87 ± 1.56 | 5.70 ± 4.32 | 3 (2/5) |
|  |  |  |  |  | 4 (3/5) |
| SjD | 51.00 ± 28.83 | 1.83 ± 1.04 | 9.67 ± 2.43 | 5.67 ± 1.26 | 3 (1/3) |
|  |  |  |  |  | 4 (2/3) |
| P value | 0.042a | 0.036a | 0.022a | 0.047a | 0.040b |
| P values were calculated using the Kruskal-Wallis(a) and Fisher test (b).  SJS, Stevens-Johnson syndrome; SjD, Sjögren’s disease. | | | | |  |
